# Supplementary material
Source: PubMed Central journal article supplement (PMC5332346)

## Supplementary Figure 1. Participant Flow Chart

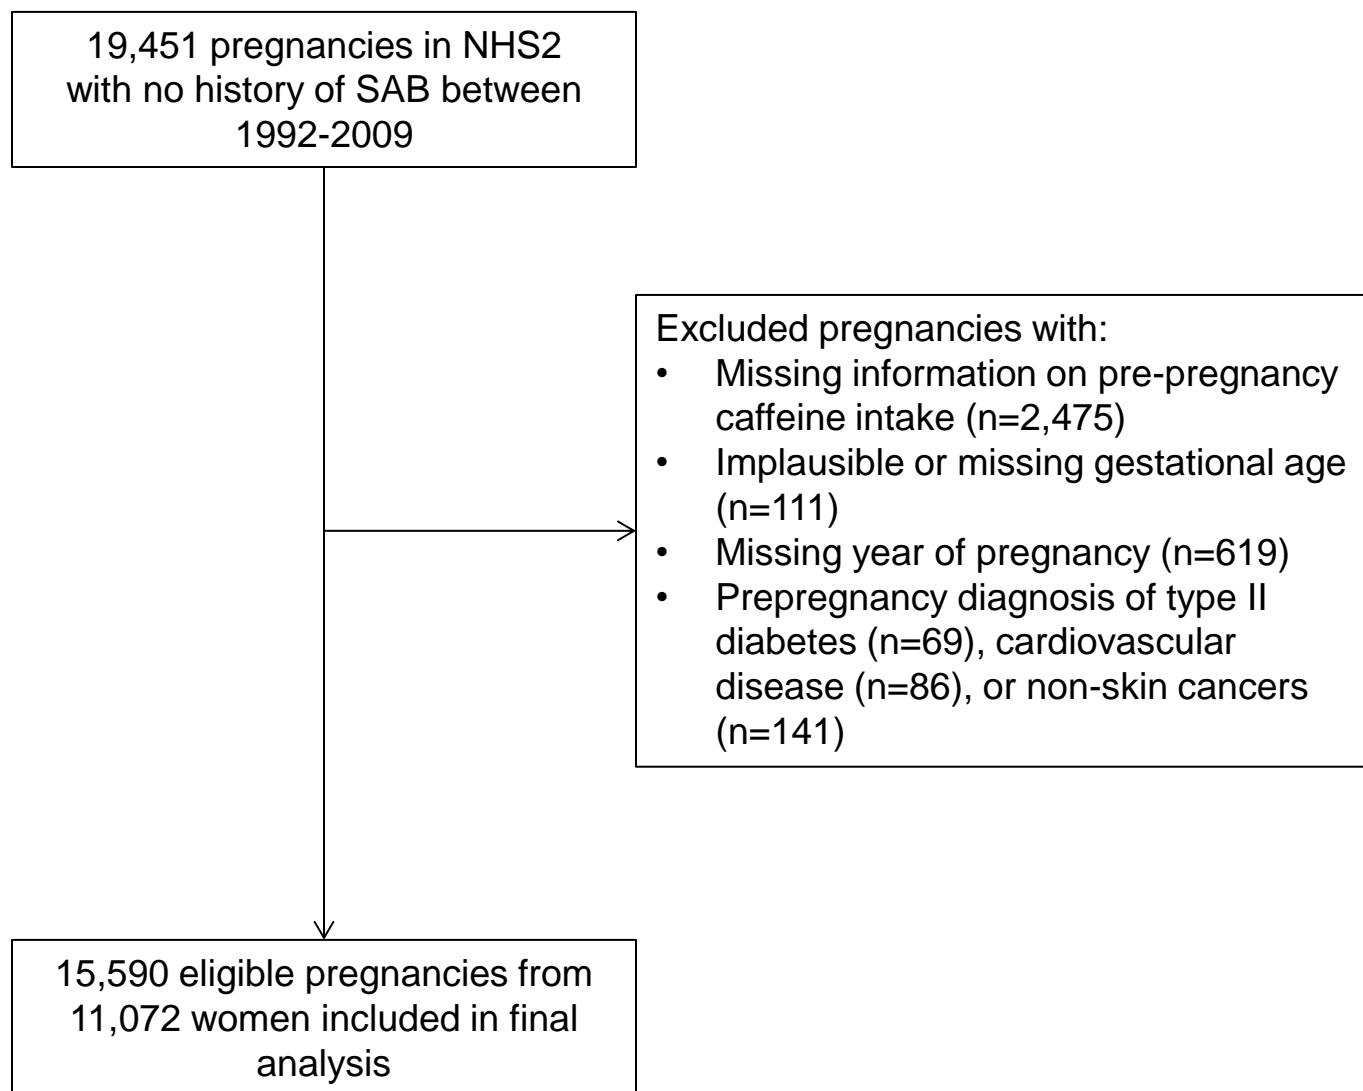

Supplement: NIHMS813599-supplement-394_2016_1301_MOESM1_ESM.pdf [file NIHMS813599-supplement-394_2016_1301_MOESM1_ESM.pdf]
